# Supplementary material for: Experimental evidence of the excited-state mixing in the blue emitter for organic light-emitting diodes
Source: Royal Society of Chemistry journal article supplement (doi:10.1039/d4tc03925d), 2024-10-24
Supplement: d4tc03925d1.pdf [file d4tc03925d1.pdf]

## SUPPORTING INFORMATION

### Experimental evidences of the excited-state mixing in the blue emitter

#### for organic light emitting diodes

Vladyslav Ievtukhov,<sup>1,2</sup> Michał Mońka,<sup>1</sup> Olga Ciupak,<sup>3</sup> Irena Bylińska,<sup>2</sup> Piotr Bojarski,<sup>1</sup> Karol

Krzymiński,<sup>2</sup> Illia E. Serdiuk<sup>1\*</sup>

<sup>1</sup> Faculty of Mathematics, Physics and Informatics, University of Gdańsk, Wita Stwosza 57, 80-308 Gdańsk, Poland

<sup>2</sup> Faculty of Chemistry, University of Gdańsk, Wita Stwosza 63, 80-308 Gdańsk, Poland

<sup>3</sup> Department of Organic Chemistry, Gdańsk University of Technology, Gabriela Narutowicza 11/12, 80-233 Gdańsk, Poland

### Contents

Section 1. Determination of photophysical parameters

Section 2. Computational determination of the nature of excited states

Section 3. Additional spectroscopic data

Section 4. Time-resolved emission spectra

Section 5. Quantum chemical calculations

## Section 1. Determination of photophysical parameters

The parameters of photophysical processes were calculated using equations described in the literature[S1,S2].

PL decay curves showed in Figure 4 (main text) were fitted with the multiexponential equation:

$$I(t) = A_0 + \sum_{i=1}^n A_i \exp\left(-t/\tau_i\right), \quad (\text{S1})$$

where  $A_i$  is the pre-exponential factor,  $\tau_i$  is the decay time and  $I(t)$  is emission intensity. Average lifetimes of prompt ( $\tau_{PF}$ ) and delayed fluorescence ( $\tau_{DF}$ ) were determined using formula:

$$\tau_{PF, DF} = \sum_{i=1}^n f_i \tau_i \quad (\text{S2})$$

where  $f_i$  is fractional contribution of  $i$ -th component expressed as:

$$f_i = \frac{A_i \tau_i}{\sum_{i=1}^n A_i \tau_i}. \quad (\text{S3})$$

The ratio of DF and PF quantum yields  $\varphi_{DF}/\varphi_{PF}$  was determined as following:

$$\frac{\varphi_{DF}}{\varphi_{PF}} = \frac{A_{DF} \tau_{DF}}{A_{PF} \tau_{PF}}, \quad (\text{S4})$$

where  $A_{DF}$  and  $A_{PF}$  are pre-exponential factors of delayed and prompt fluorescence, respectively. Rate constants of radiative ( $k_r$ ) and nonradiative ( $k_{nr}$ ) decay and intersystem crossing ( $k_{ISC}$ ) were given by equations:

$$k_r = \frac{\varphi_{PF}}{\tau_{PF}}, \quad (\text{S5})$$

$$k_{ISC} = \frac{\varphi_{DF}}{\varphi \tau_{PF}}, \quad (\text{S6})$$

$$k_{nr} = \frac{1}{\tau_{PF}} - (k_r + k_{ISC}), \quad (\text{S7})$$

where  $\varphi$  is PLQY ( $\varphi_{DF} + \varphi_{PF}$ ). Further, the quantum yields for ISC and rISC were calculated as

$$\varphi_{ISC} = k_{ISC} \tau_{PF}, \quad (\text{S8})$$

$$\varphi_{rISC} = \frac{1 - \varphi_{PF}/\varphi}{\varphi_{ISC}}. \quad (\text{S9})$$

Finally, rate constant for rISC ( $k_{rISC}$ ) was calculated as

$$k_{rISC} = \frac{\varphi_{rISC} \left( \frac{\varphi}{\tau_{DF}} \right)}{\varphi_{PF}}. \quad (\text{S10})$$

Thus obtained photophysical parameters are presented in **Table 1**, main text.

## Section 2. Additional spectroscopic data

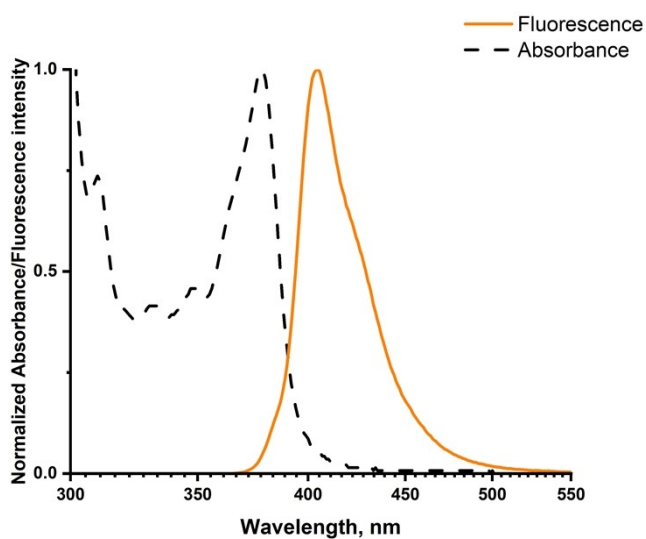

Figure S1. Absorbance and fluorescence spectra of TMCz-BO in methylcyclohexane (MCH) solution.

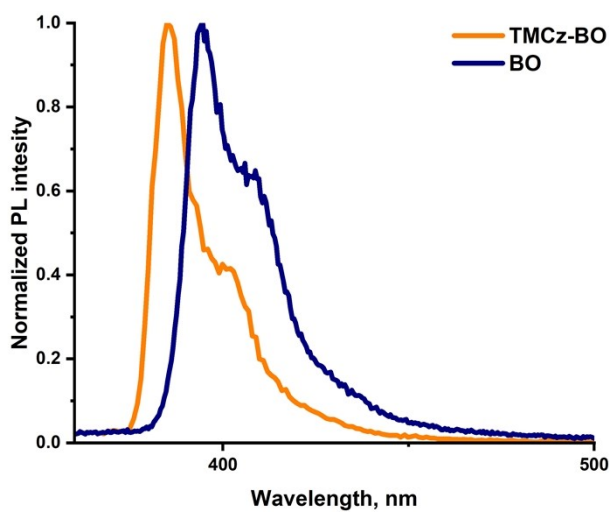

Figure S2. Fluorescence spectra of **TMCz-BO** and acceptor fragment **BO** in MCH solution at room temperature

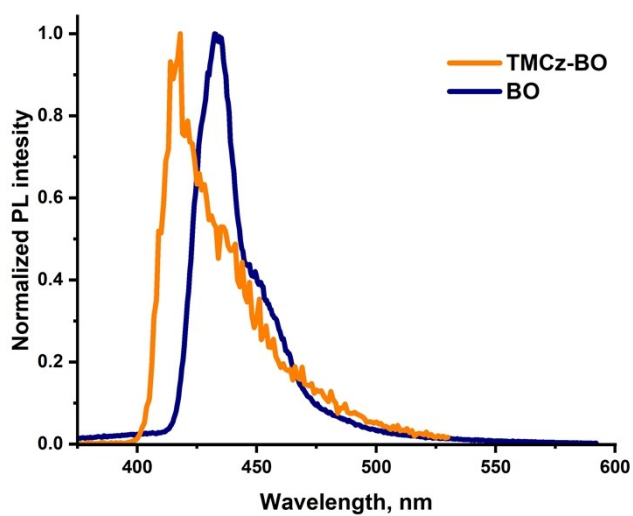

Figure S3. Phosphorescence spectra of **TMCz-BO** and the acceptor molecule **BO** in MCH frozen glass at 77K.

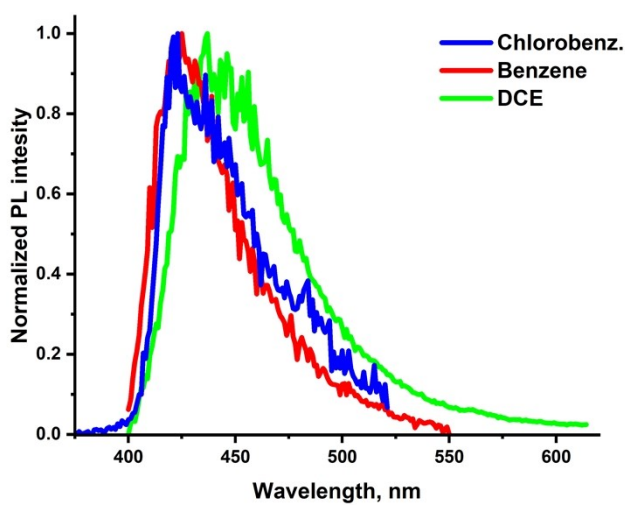

Figure S4. Phosphorescence spectra of TMCz-BO in chlorobenzene, benzene and DCE frozen solutions at 77K

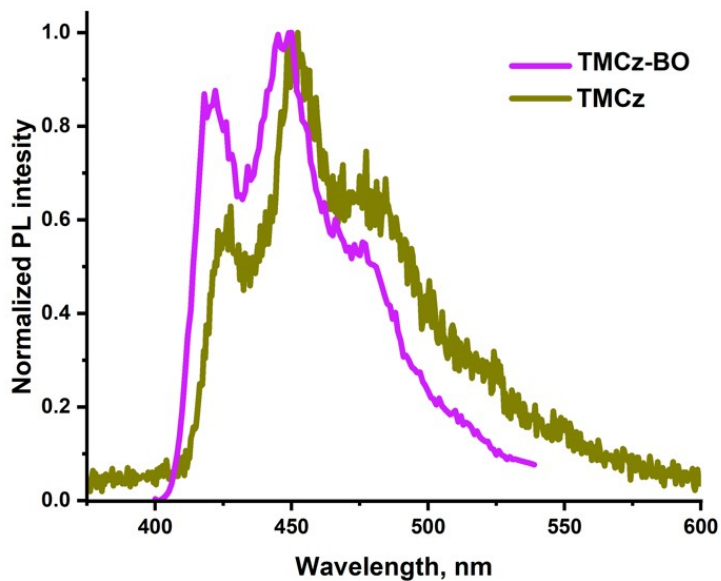

Figure S5. Phosphorescence spectra of TMCz-BO in frozen DMSO and the TMCz donor at 77K.

Table S1. Linear regression parameters for the fitted linear dependencies Figure 3, main text.

| Parameter | Plot B<br>$\ln k_r$ vs. $E_{SI}$ | Plot D<br>$\ln k_{rISC}$ vs. $E_{SI}$ | Plot C<br>$\ln k_{ISC}$ vs. $E_{SI}$ | Plot E<br>$\ln k_{rISC}$ vs. $k_r$ | Plot F<br>$k_{ISC}$ vs. $k_r$ |
|-----------|----------------------------------|---------------------------------------|--------------------------------------|------------------------------------|-------------------------------|
| Slope     | $2.65 \pm 0.34$                  | $-1.16 \pm 0.09$                      | $-4.14 \pm 0.87$                     | $-0.72 \pm 0.07$                   | $-1.76 \pm 0.27$              |
| Intercept | $7.91 \pm 1.01$                  | $18.34 \pm 0.26$                      | $28.03 \pm 2.59$                     | $15.45 \pm 0.06$                   | $21.84 \pm 2.16$              |
| $R^2$     | 0.953                            | 0.984                                 | 0.882                                | 0.97                               | 0.933                         |

### Section 3. Computational determination of the nature of excited states

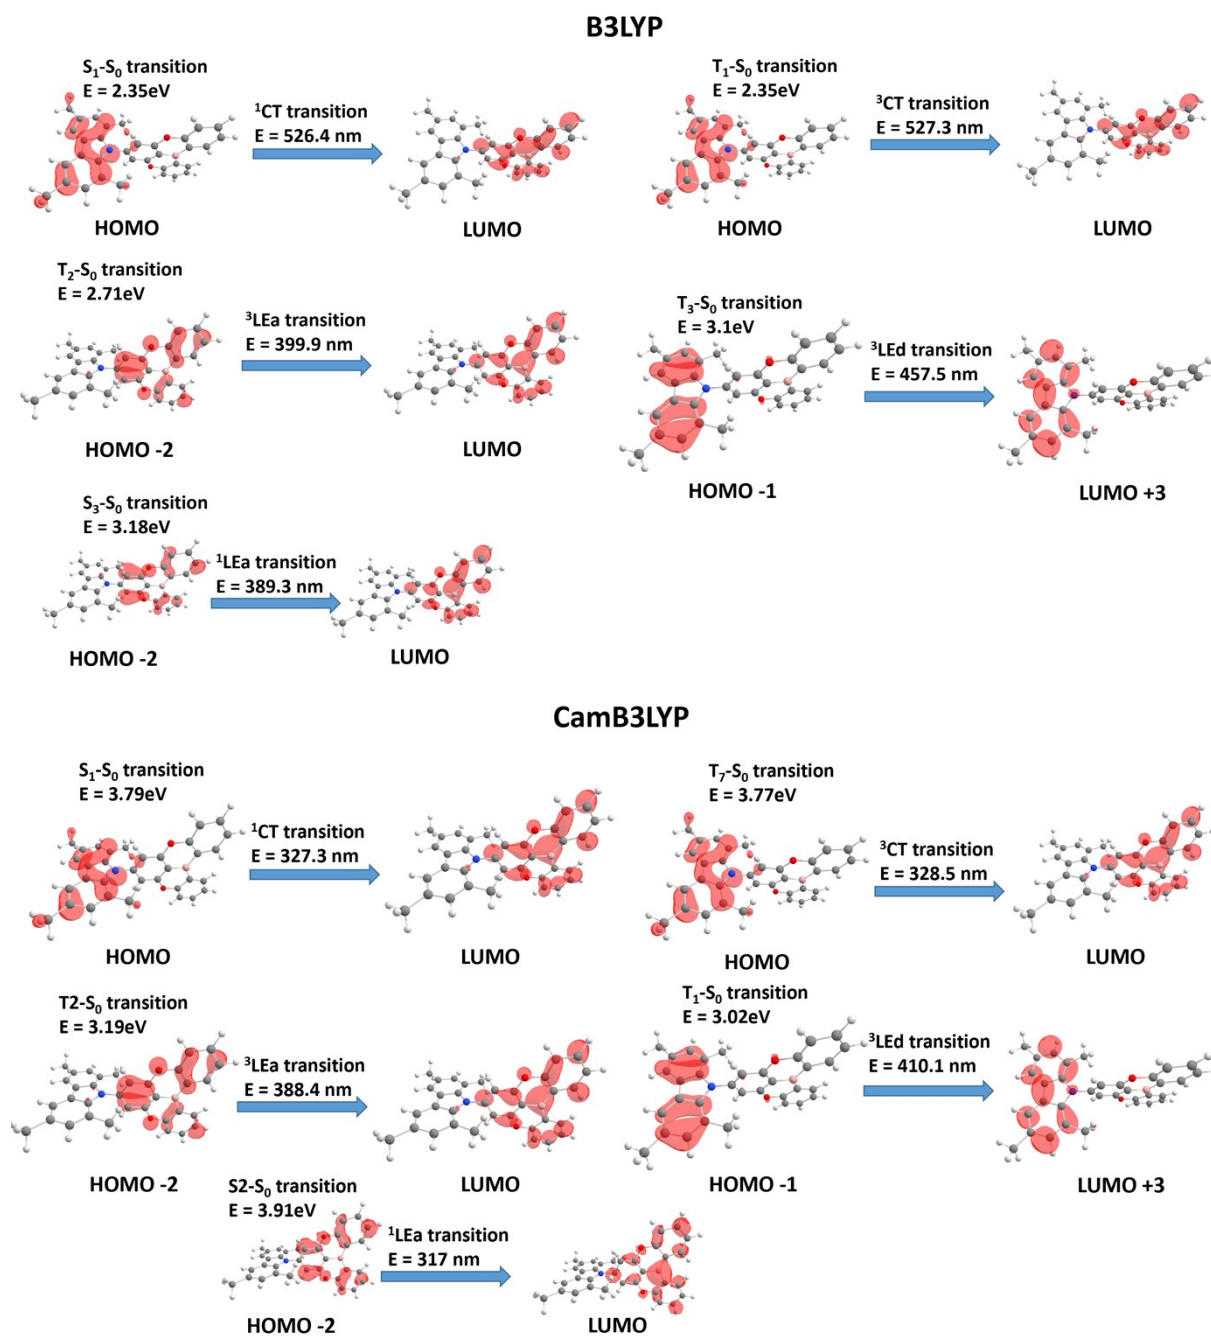

**Figure S6.** Profiles of molecular orbitals calculated using various levels of theory; for clarity only one sign of wave function is shown.

### M06

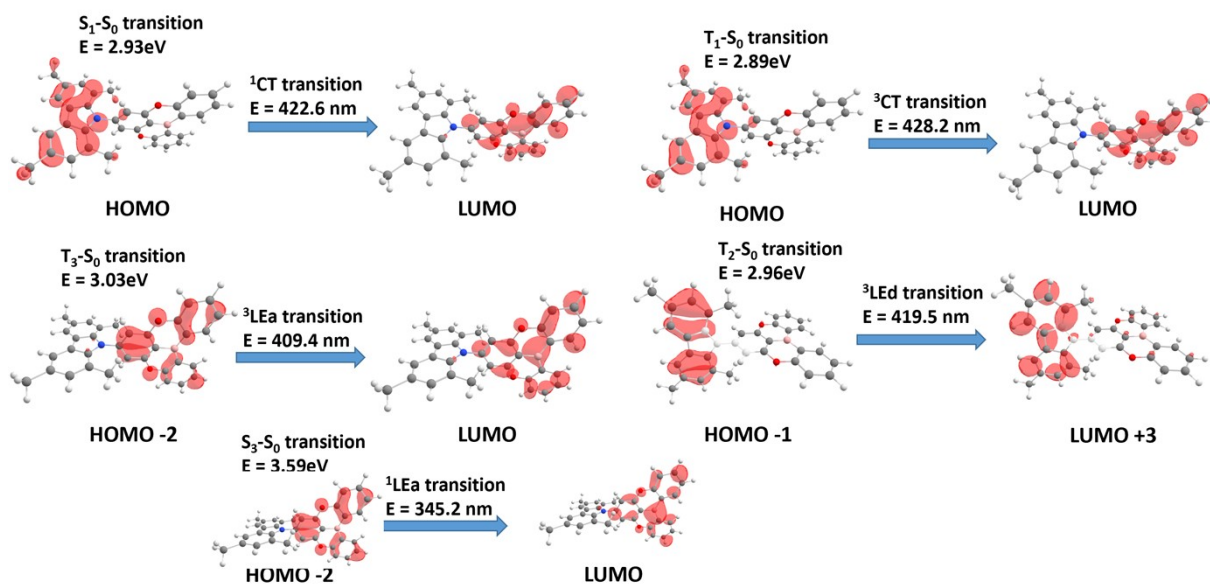

### M062X

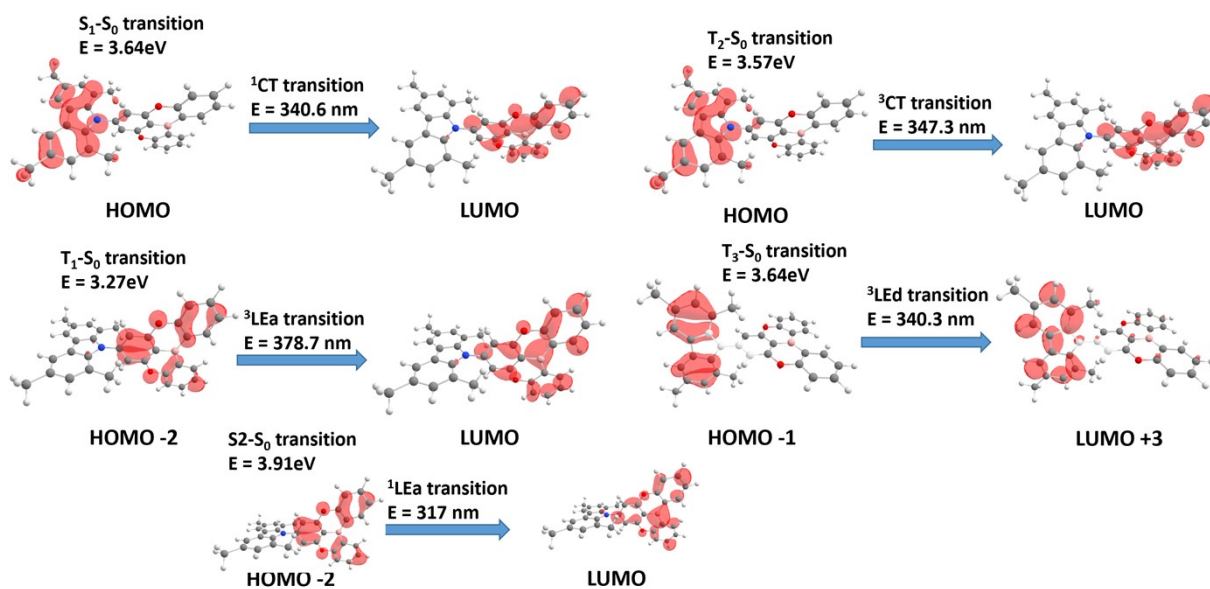

Figure S6. continued

PBEU

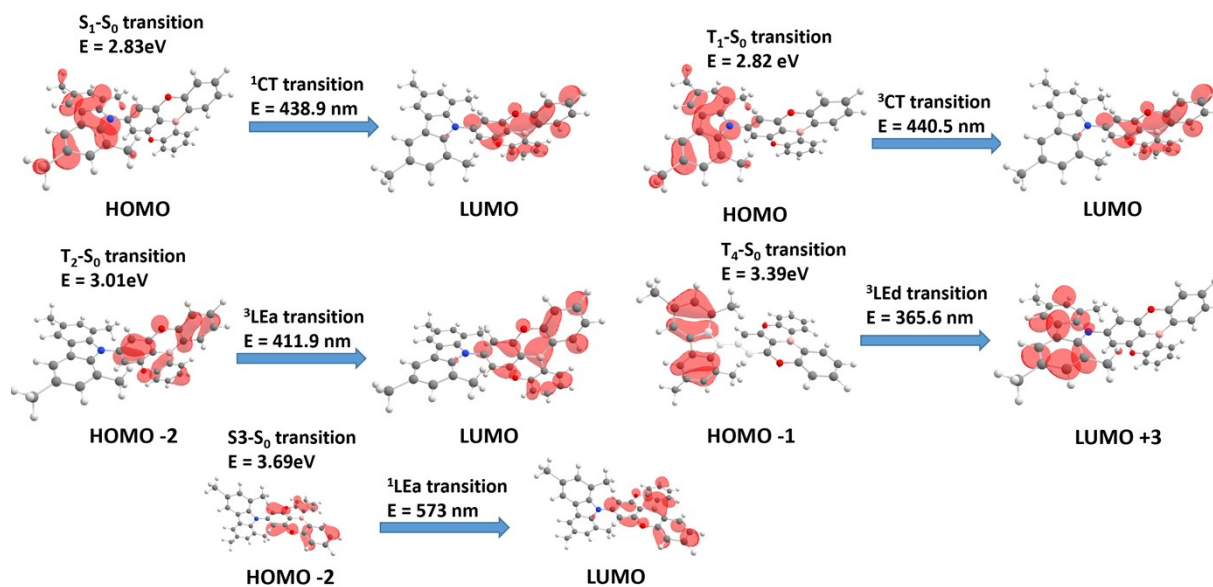

Figure S6. continued



#### Section 4. Time-resolved emission spectra

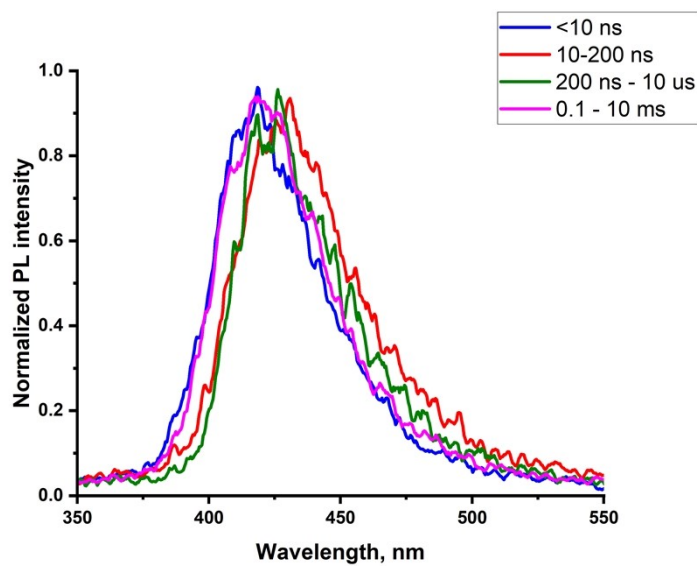

Figure S7. TRES of TMCz-BO in ZNX film (0.1%, w/w) at RT, vacuum.

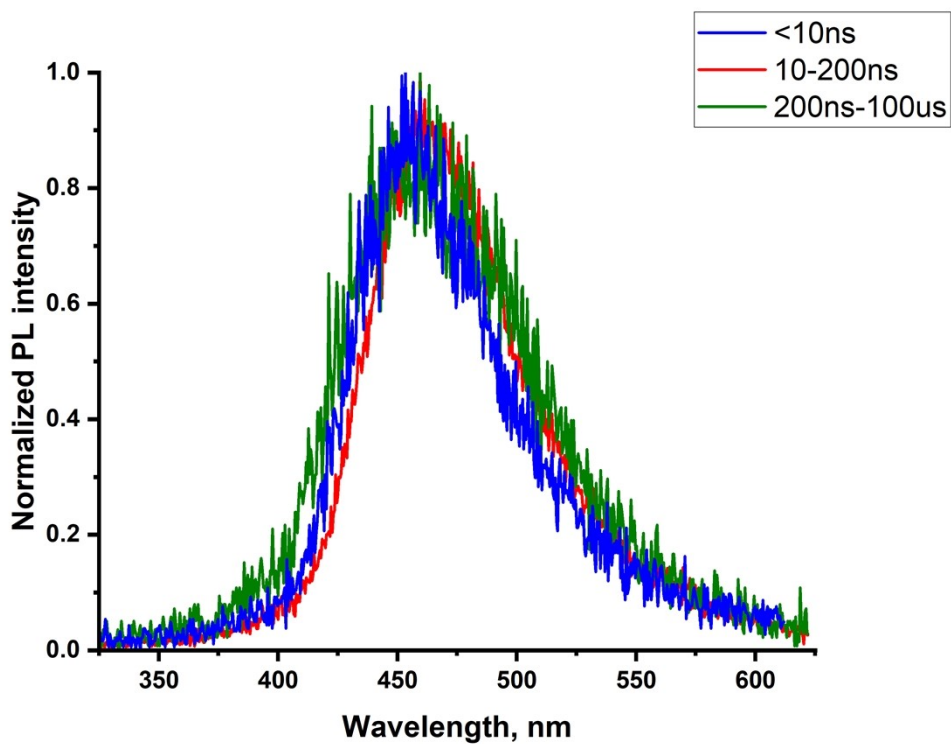

Figure S8. TRES of TMCz-BO in DPEPO film (10%, w/w) at RT, vacuum

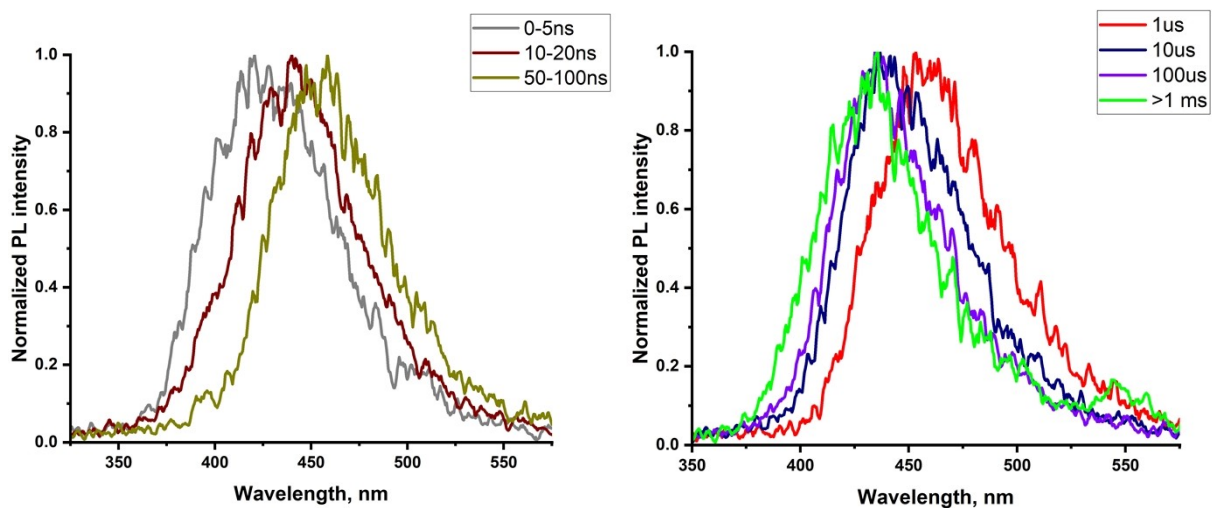

Figure S9. TRES of TMCz-BO in PMMA film (0.1%,  $w/w$ ) at RT, vacuum.

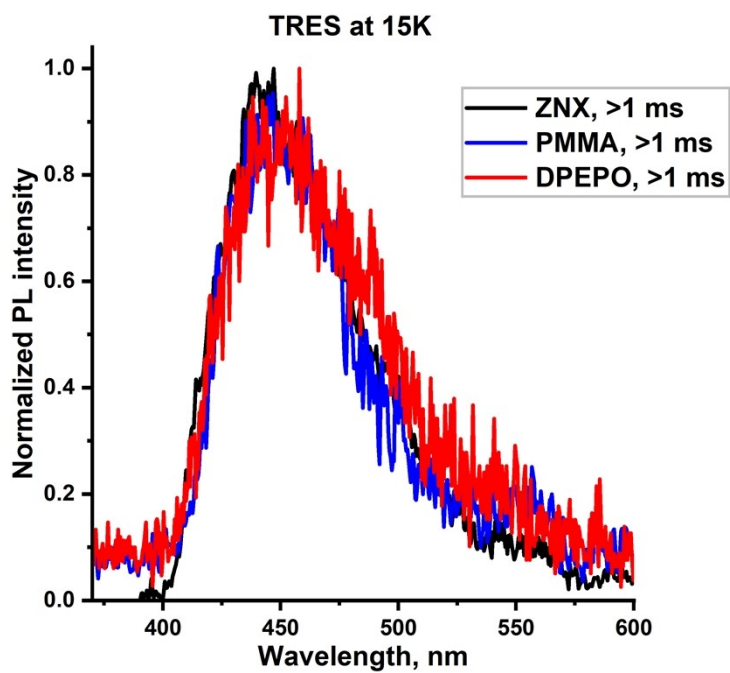

Figure S10. PL spectra of TMCz-BO in doped films at 15 K with a delay time of 1 ms.

## Comparison of TMCz-BO spectra in the MCH solvent and ZNX host

Table S2. Full-width at half-maximum (FWHM) values in MCH solution and ZNX film

|     | Fluorescence |      | Phosphorescence |      |
|-----|--------------|------|-----------------|------|
|     | [nm]         | [eV] | [nm]            | [eV] |
| MCH | 35           | 0.26 | 34              | 0.23 |
| ZNX | 41           | 0.29 | 66              | 0.41 |

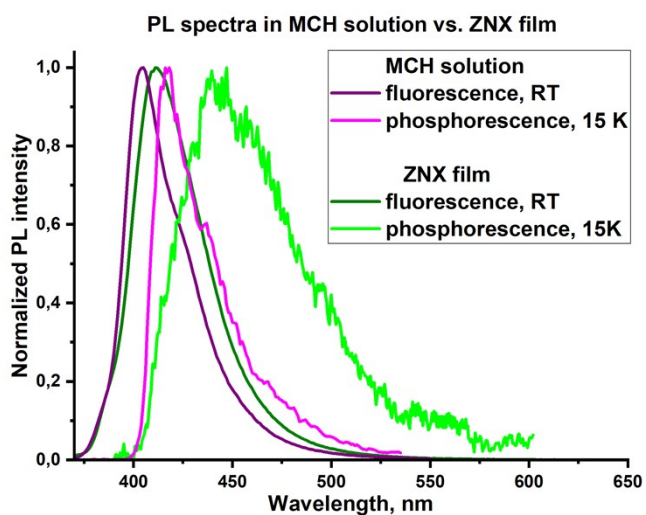

Figure S11. Fluorescence (RT) and phosphorescence (15K) spectra in MCH solution and ZNX film.

## Section 5. Quantum Chemical Calculations

### Calculations of electronic parameters and rISC values

For the calculations of  $k_{\text{rISC}}$  values Marcus-Hush equation [S3] was used

$$k = \frac{V^2}{\hbar} \sqrt{\frac{\pi}{k_{\text{B}}T\lambda}} \exp\left[-\frac{(\Delta E_{\text{ST}} + \lambda)^2}{4k_{\text{B}}T\lambda}\right] \quad (1)$$

where:

$k$  is a rate constant

$V$  is the SOC constant

$\lambda$  is the sum of internal and external ( $\lambda_{\text{solv}}$ ) reorganization energies for the respective transition

$\Delta E_{\text{ST}}$  is an energy gap between singlet and triplet state

$k_{\text{B}}$  is the Boltzmann constant

$\hbar$  is the reduced Planck's constant

$T$  is the temperature (298.15 K).

On the B3LYP/cc-pVDZ level of theory, the value of the  $\Delta E_{3\text{CT}\rightarrow 1\text{CT}}$  energy gap was predicted of 4.5 meV for the 90° rotamer. Deviation of  $\theta$  from the optimal value causes the increase of  $\Delta E_{3\text{CT}\rightarrow 1\text{CT}}$  values as shown in Table S6. To take this into account, the statistically weighted  $\Delta E_{3\text{CT}\rightarrow 1\text{CT}}$  was calculated using population of each  $\theta$ -rotamer given by Boltzmann distribution at room temperature using respective energies of species (Table S4, S5). To describe the rISC dynamics in solutions,  $\theta$ -rotamer population in the  $T_1$  ( $^3\text{CT}$ ) state geometry was used. The statistically weighted  $\Delta E_{(3\text{CT}\rightarrow 1\text{CT})_{\text{w}}}$  value of 7.8 meV was obtained as described below. The calculated reorganization energies (Table S7) and SOC constants (Table S8) at various  $\theta$  are presented below.

The  $\Delta E_{3\text{CT}\rightarrow 1\text{CT}}$  values in various solvents were estimated using the  $k_{\text{r}}(E_{\text{S}_1})$  dependence as described in [S2]. Specifically, DFT calculations predicted  $\text{PL}_{\text{max}}$  of 526 nm matching well the experimental value of 519 nm obtained for the DCE solution (Table 1, main text). The abovementioned  $\Delta E_{3\text{CT}\rightarrow 1\text{CT}}$  value of 7.8 meV was thus ascribed to the DCE medium. Taking into account linear dependence of  $k_{\text{r}}$  on the  $S_1$  energy (Figure 3B) and  $\ln(k_{\text{rISC}})$  on  $k_{\text{r}}$  (Figure 3D), linear correlation between  $k_{\text{r}}$  and  $\Delta E_{3\text{CT}\rightarrow 1\text{CT}}$  was assumed. Therefore,  $\Delta E_{3\text{CT}\rightarrow 1\text{CT}}$  for other solvents were estimated by proportion using experimental  $k_{\text{r}}$  values (Table S3).

For each medium, statistically weighted  $k_{3CT \rightarrow 1CT}$  rate constants were obtained (Table S3) using Marcus-Hush equation (1) for each  $\theta$ -rotamer via three approaches. As described below, these approaches use different SOC constants, and the same set of  $\Delta E_{(3CT \rightarrow 1CT)}(\theta)$  and  $\lambda(\theta)$  for each medium.

Table S3. Summary of estimation of  $\Delta E_{(3CT \rightarrow 1CT)_w}$ ,  $\ln(k_{T1-S1})_w$ , and  $V_w$  for different media.

|         | $E_{S1}$<br>[eV] | $k_r$<br>[ $10^{-6} \text{ s}^{-1}$ ] | $\Delta E_{(3CT \rightarrow 1CT)_w}$ ,<br>meV | $\ln(k_{T1-S1})_w^a$ |                              | exper.                 | $V_w$ variable, <sup>d</sup><br>[ $\text{cm}^{-1}$ ] |
|---------|------------------|---------------------------------------|-----------------------------------------------|----------------------|------------------------------|------------------------|------------------------------------------------------|
|         |                  |                                       |                                               | $V_w = V_{3CT-1CT}$  | $V_w = 0.44 \text{ cm}^{-1}$ | ( $V_w$ is a variable) |                                                      |
| Tol/Hex | 3.19             | 11.0                                  | 15.6                                          | 13.01                | 14.39                        | 14.7                   | 0.051                                                |
| Benz.   | 3.04             | 8.7                                   | 12.3                                          | 13.29                | 14.64                        | 14.8                   | 0.049                                                |
| ClBenz. | 2.99             | 8.4                                   | 11.9                                          | 13.33                | 14.68                        | 14.9                   | 0.048                                                |
| DCE     | 2.86             | 5.5                                   | 7.8                                           | 13.75                | 15.11                        | 15.1                   | 0.045                                                |
| DMSO    | 2.75             | 3.5                                   | 5.0                                           | 14.14                | 15.41                        | 15.1                   | 0.038                                                |

$E_{S1}$  – energy of the  $S_1$  state obtained experimentally from  $PL_{\text{onset}}$ ;

$\Delta E_{(3CT \rightarrow 1CT)_w}$  – statistically weighted energy gap between  $^3CT$  and  $^1CT$  states obtained by DFT calculations (for DCM) or using proportion:

$$\Delta E_{(3CT \rightarrow 1CT)_w}(i\text{-solvent}) = k_r(i) * \Delta E_{(3CT \rightarrow 1CT)_w}(\text{DCM}) / k_r(\text{DCM});$$

<sup>a</sup> statistically weighted rISC constants calculated using 1)  $V_{3CT-1CT}$  predicted for each  $\theta$ -rotamer (Approach 1); 2)  $V$  values giving a statistically weighted  $V_w$  value of  $0.44 \text{ cm}^{-1}$  (Approach 2), or 3) variable  $V$  values obtained from the reconstruction of experimental  $k_{\text{rISC}}$  values (Approach 3);

<sup>b</sup> statistically weighted variable  $V$  values obtained from the reconstruction of experimental  $k_{\text{rISC}}$  values using  $\Delta E_{(3CT \rightarrow 1CT)_w}$ ;

note that in all calculations, the external reorganization energy was equal to  $\Delta E_{(3CT \rightarrow 1CT)}$  for each  $\theta$ -rotamer.

**Dependence of electronic parameters on the dihedral angle between donor and acceptor fragments ( $\theta$ )**

**Table S4.** Relative energies of the species with various  $\theta$  value in various electronic states.

| $\theta$ [°] | Energies of electronic states<br>relative to the optimal geometry in the same state [eV] |                 |                              |                 |                              |                              |
|--------------|------------------------------------------------------------------------------------------|-----------------|------------------------------|-----------------|------------------------------|------------------------------|
|              | S <sub>0</sub>                                                                           | <sup>1</sup> CT | <sup>1</sup> LE <sub>A</sub> | <sup>3</sup> CT | <sup>3</sup> LE <sub>A</sub> | <sup>3</sup> LE <sub>D</sub> |
| 60           | 0.27                                                                                     | 0.57            | 0.26                         | 0.48            | 0.28                         | 0.20                         |
| 65           | 0.15                                                                                     | 0.37            | 0.14                         | 0.30            | 0.16                         | 0.21                         |
| 70           | 0.082                                                                                    | 0.23            | 0.071                        | 0.18            | 0.086                        | 0.14                         |
| 75           | -                                                                                        | -               | 0.034                        | 0.094           | 0.042                        | 0.059                        |
| 77           | 0.039                                                                                    | 0.10            | -                            | 0.069           | -                            | -                            |
| 80           | 0.015                                                                                    | 0.056           | 0.014                        | 0.040           | 0.017                        | 0.026                        |
| 82           | 0.0091                                                                                   | 0.034           | -                            | 0.025           | 0.010                        | 0.013                        |
| 84           | 0.0048                                                                                   | 0.019           | -                            | 0.014           | 0.0054                       | 0.0076                       |
| 85           | -                                                                                        | -               | 0.0036                       | -               | -                            | -                            |
| 86           | 0.0020                                                                                   | 0.0078          | -                            | 0.0058          | 0.0020                       | 0.0038                       |
| 88           | 0.0008                                                                                   | 0.0019          | 0.0                          | 0.00            | 0.00019                      | 0.0015                       |
| 90           | 0.0000                                                                                   | 0.0000          | 0.00030                      | 0.0058          | 0.0                          | 0.00                         |
| 92           | 0.0008                                                                                   | 0.0019          | 0.0                          | 0.014           | 0.00019                      | 0.0015                       |
| 94           | 0.0020                                                                                   | 0.0078          | -                            | 0.025           | 0.0020                       | 0.0038                       |
| 95           | -                                                                                        | -               | 0.0036                       | -               | -                            | -                            |
| 96           | 0.0048                                                                                   | 0.019           | -                            | 0.040           | 0.0054                       | 0.0076                       |
| 98           | 0.0091                                                                                   | 0.034           | -                            | 0.069           | 0.010                        | 0.013                        |
| 100          | 0.015                                                                                    | 0.056           | 0.014                        | 0.094           | 0.017                        | 0.026                        |
| 103          | 0.039                                                                                    | 0.10            | -                            | 0.18            | -                            | -                            |
| 105          | -                                                                                        | -               | 0.034                        | 0.30            | 0.042                        | 0.059                        |
| 110          | 0.082                                                                                    | 0.23            | 0.071                        | 0.48            | 0.086                        | 0.14                         |
| 115          | 0.15                                                                                     | -               | 0.14                         | -               | 0.16                         | 0.21                         |
| 120          | 0.27                                                                                     | -               | 0.26                         | -               | 0.28                         | 0.20                         |

Table S5. Population ( $p$ ) of species with various  $\theta$  value

|              | Population of rotamers, $p$ [%] |                        |                              |                        |                              |                              |
|--------------|---------------------------------|------------------------|------------------------------|------------------------|------------------------------|------------------------------|
| $\theta$ [°] | S <sub>0</sub>                  | <sup>1</sup> CT        | <sup>1</sup> LE <sub>A</sub> | <sup>3</sup> CT        | <sup>3</sup> LE <sub>A</sub> | <sup>3</sup> LE <sub>D</sub> |
| 60           | 2.39×10 <sup>-6</sup>           | 3.14×10 <sup>-11</sup> | 6.55×10 <sup>-6</sup>        | 9.54×10 <sup>-10</sup> | 2.30×10 <sup>-6</sup>        | 5.46×10 <sup>-5</sup>        |
| 65           | 2.67×10 <sup>-4</sup>           | 9.03×10 <sup>-8</sup>  | 4.90×10 <sup>-4</sup>        | 1.18×10 <sup>-6</sup>  | 2.35×10 <sup>-4</sup>        | 2.44×10 <sup>-5</sup>        |
| 70           | 4.41×10 <sup>-3</sup>           | 2.47×10 <sup>-5</sup>  | 6.69×10 <sup>-3</sup>        | 1.40×10 <sup>-4</sup>  | 3.82×10 <sup>-3</sup>        | 1.08×10 <sup>-3</sup>        |
| 75           | -                               | -                      | 2.89×10 <sup>-2</sup>        | 3.63×10 <sup>-3</sup>  | 2.08×10 <sup>-2</sup>        | 1.19×10 <sup>-2</sup>        |
| 77           | 2.31×10 <sup>-2</sup>           | 2.76×10 <sup>-3</sup>  | -                            | 9.87×10 <sup>-3</sup>  | -                            | -                            |
| 80           | 5.85×10 <sup>-2</sup>           | 1.85×10 <sup>-2</sup>  | 6.33×10 <sup>-2</sup>        | 3.00×10 <sup>-2</sup>  | 5.58×10 <sup>-2</sup>        | 4.82×10 <sup>-2</sup>        |
| 82           | 7.38×10 <sup>-2</sup>           | 4.42×10 <sup>-2</sup>  | -                            | 5.36×10 <sup>-2</sup>  | 7.20×10 <sup>-2</sup>        | 6.86×10 <sup>-2</sup>        |
| 84           | 8.74×10 <sup>-2</sup>           | 7.97×10 <sup>-2</sup>  | 9.37×10 <sup>-2</sup>        | 8.35×10 <sup>-2</sup>  | 8.72×10 <sup>-2</sup>        | 9.06×10 <sup>-2</sup>        |
| 86           | 9.76×10 <sup>-2</sup>           | 1.21×10 <sup>-1</sup>  | -                            | 1.14×10 <sup>-1</sup>  | 9.95×10 <sup>-2</sup>        | 1.09×10 <sup>-1</sup>        |
| 88           | 0.1×10 <sup>-1</sup>            | 1.52×10 <sup>-1</sup>  | 1.08×10 <sup>-1</sup>        | 1.34×10 <sup>-1</sup>  | 1.07×10 <sup>-1</sup>        | 1.17×10 <sup>-1</sup>        |
| 90           | 1.05×10 <sup>-1</sup>           | 1.64×10 <sup>-1</sup>  | 1.06×10 <sup>-1</sup>        | 1.43×10 <sup>-1</sup>  | 1.08×10 <sup>-1</sup>        | 1.20×10 <sup>-1</sup>        |
| 92           | 1.02×10 <sup>-1</sup>           | 1.52×10 <sup>-1</sup>  | 1.08×10 <sup>-1</sup>        | 1.34×10 <sup>-1</sup>  | 1.07×10 <sup>-1</sup>        | 1.17×10 <sup>-1</sup>        |
| 94           | 9.76×10 <sup>-2</sup>           | 1.21×10 <sup>-1</sup>  | 9.37×10 <sup>-2</sup>        | 1.14×10 <sup>-1</sup>  | 9.95×10 <sup>-2</sup>        | 1.09×10 <sup>-1</sup>        |
| 96           | 8.74×10 <sup>-2</sup>           | 7.97×10 <sup>-2</sup>  | -                            | 8.35×10 <sup>-2</sup>  | 8.72×10 <sup>-2</sup>        | 9.06×10 <sup>-2</sup>        |
| 98           | 7.38×10 <sup>-2</sup>           | 4.42×10 <sup>-2</sup>  | -                            | 5.36×10 <sup>-2</sup>  | 7.20×10 <sup>-2</sup>        | 6.86×10 <sup>-2</sup>        |
| 100          | 5.85×10 <sup>-2</sup>           | 1.85×10 <sup>-2</sup>  | 6.33×10 <sup>-2</sup>        | 3.00×10 <sup>-2</sup>  | 5.58×10 <sup>-2</sup>        | 4.82×10 <sup>-2</sup>        |
| 103          | 2.31×10 <sup>-2</sup>           | 2.76×10 <sup>-3</sup>  | -                            | 9.87×10 <sup>-3</sup>  | -                            | -                            |
| 105          | -                               | -                      | 2.89×10 <sup>-2</sup>        | 3.63×10 <sup>-3</sup>  | 2.08×10 <sup>-2</sup>        | 1.19×10 <sup>-2</sup>        |
| 110          | 4.41×10 <sup>-3</sup>           | 2.47×10 <sup>-5</sup>  | 6.69×10 <sup>-3</sup>        | 1.40×10 <sup>-4</sup>  | 3.82×10 <sup>-3</sup>        | 1.08×10 <sup>-3</sup>        |
| 115          | 2.67×10 <sup>-4</sup>           | -                      | 4.90×10 <sup>-4</sup>        | -                      | 2.35×10 <sup>-4</sup>        | 2.44×10 <sup>-5</sup>        |
| 120          | 2.39×10 <sup>-6</sup>           | -                      | 4.64×10 <sup>-6</sup>        | -                      | 2.30×10 <sup>-6</sup>        | 5.46×10 <sup>-5</sup>        |

**Table S6.** Calculated singlet-triplet energy gaps between selected states as a function of  $\theta$ .

| $\theta$ [°] | Energy gap [eV]           |                             |                             |
|--------------|---------------------------|-----------------------------|-----------------------------|
|              | $^1\text{CT-}^3\text{CT}$ | $^1\text{CT-}^3\text{LE}_A$ | $^1\text{CT-}^3\text{LE}_D$ |
| 60           | 0.10                      | 0.30                        | 0.20                        |
| 65           | 0.074                     | 0.21                        | 0.15                        |
| 70           | 0.053                     | 0.14                        | 0.11                        |
| 77           | 0.028                     | 0.082                       | 0.070                       |
| 80           | 0.019                     | 0.036                       | 0.033                       |
| 82           | 0.013                     | 0.023                       | 0.020                       |
| 84           | 0.0092                    | 0.013                       | 0.012                       |
| 86           | 0.0065                    | 0.0059                      | 0.006                       |
| 88           | 0.0048                    | 0.0018                      | 0.00017                     |
| 90           | 0.0045                    | 0.000074                    | 0.0013                      |
| 92           | 0.0048                    | 0.0018                      | 0.00017                     |
| 94           | 0.0065                    | 0.0059                      | 0.0061                      |
| 96           | 0.0092                    | 0.013                       | 0.012                       |
| 98           | 0.013                     | 0.023                       | 0.020                       |
| 100          | 0.019                     | 0.036                       | 0.033                       |
| 103          | 0.028                     | 0.082                       | 0.070                       |
| 110          | 0.053                     | 0.14                        | 0.11                        |
| 115          | 0.074                     | 0.21                        | 0.15                        |
| 120          | 0.10                      | 0.30                        | 0.20                        |



**Table S7.** Calculated internal reorganization energies for selected spin-flip transitions in TMCz-BO and DMAC-TRZ as a function of  $\theta$ .

| $\theta$ [°] | Internal reorganization energy [eV] |                             |                             |                           |                             |
|--------------|-------------------------------------|-----------------------------|-----------------------------|---------------------------|-----------------------------|
|              | TMCz-BO                             |                             |                             | DMAC-TRZ                  |                             |
|              | $^1\text{CT-}^3\text{CT}$           | $^1\text{CT-}^3\text{LE}_A$ | $^1\text{CT-}^3\text{LE}_D$ | $^1\text{CT-}^3\text{CT}$ | $^1\text{CT-}^3\text{LE}_A$ |
| 60           | 0.0038                              | 0.046                       | 0.095                       | -                         | -                           |
| 65           | 0.0025                              | 0.079                       | 0.080                       | 0.15                      | 0.23                        |
| 70           | 0.0018                              | 0.10                        | 0.10                        | 0.10                      | 0.22                        |
| 75           | 0.0011                              | 0.12                        | 0.12                        | 0.062                     | 0.22                        |
| 80           | 0.00063                             | 0.13                        | 0.13                        | 0.032                     | 0.21                        |
| 82           | 0.00047                             | 0.13                        | 0.13                        | 0.023                     | 0.21                        |
| 84           | 0.00033                             | 0.13                        | 0.13                        | 0.016                     | 0.21                        |
| 86           | 0.00021                             | 0.14                        | 0.14                        | 0.011                     | 0.21                        |
| 88           | 0.00014                             | 0.14                        | 0.14                        | 0.0076                    | 0.21                        |
| 90           | 0.0                                 | 0.14                        | 0.14                        | 0.0066                    | 0.21                        |
| 92           | 0.00014                             | 0.14                        | 0.14                        | 0.0076                    | 0.21                        |
| 94           | 0.00021                             | 0.14                        | 0.14                        | 0.011                     | 0.21                        |
| 96           | 0.00033                             | 0.13                        | 0.13                        | 0.016                     | 0.21                        |
| 98           | 0.00047                             | 0.13                        | 0.13                        | 0.023                     | 0.21                        |
| 100          | 0.00063                             | 0.13                        | 0.13                        | 0.032                     | 0.21                        |
| 105          | 0.0011                              | 0.12                        | 0.12                        | 0.062                     | 0.22                        |
| 110          | 0.0018                              | 0.10                        | 0.10                        | 0.10                      | 0.22                        |
| 115          | 0.0025                              | 0.079                       | 0.080                       | 0.15                      | 0.23                        |
| 120          | 0.0038                              | 0.046                       | 0.095                       | -                         | -                           |

**Table S8.** Calculated SOC constants for various transitions and values.

| $\theta$ [°] | SOC [ $\text{cm}^{-1}$ ]                         |                                                    |                                                    |                                                    |                                                      |                                                      |
|--------------|--------------------------------------------------|----------------------------------------------------|----------------------------------------------------|----------------------------------------------------|------------------------------------------------------|------------------------------------------------------|
|              | ${}^1\text{CT} \rightleftharpoons {}^3\text{CT}$ | ${}^1\text{CT} \rightleftharpoons {}^3\text{LE}_A$ | ${}^1\text{CT} \rightleftharpoons {}^3\text{LE}_D$ | ${}^1\text{LE}_A \rightleftharpoons {}^3\text{CT}$ | ${}^1\text{LE}_A \rightleftharpoons {}^3\text{LE}_A$ | ${}^1\text{LE}_A \rightleftharpoons {}^3\text{LE}_D$ |
| 60           | 0.11                                             | 0.18                                               | 0.10                                               | 0.18                                               | 0.019                                                | 0.040                                                |
| 65           | 0.10                                             | 0.16                                               | 0.15                                               | 0.18                                               | 0.014                                                | 0.030                                                |
| 70           | 0.090                                            | 0.13                                               | 0.16                                               | 0.17                                               | 0.0075                                               | 0.020                                                |
| 77           | 0.070                                            | 0.12                                               | 0.17                                               | 0.17                                               | 0.0025                                               | 0.0080                                               |
| 80           | 0.050                                            | 0.11                                               | 0.17                                               | 0.16                                               | 0.0                                                  | 0.0060                                               |
| 82           | 0.040                                            | 0.11                                               | 0.17                                               | 0.16                                               | 0.0                                                  | 0.0040                                               |
| 84           | 0.030                                            | 0.11                                               | 0.17                                               | 0.16                                               | 0.0                                                  | 0.0030                                               |
| 86           | 0.020                                            | 0.11                                               | 0.17                                               | 0.16                                               | 0.0                                                  | 0.0020                                               |
| 88           | 0.010                                            | 0.10                                               | 0.17                                               | 0.16                                               | 0.0                                                  | 0.0                                                  |
| 90           | 0.0                                              | 0.10                                               | 0.17                                               | 0.16                                               | 0.0                                                  | 0.0                                                  |
| 92           | 0.010                                            | 0.10                                               | 0.17                                               | 0.16                                               | 0.0                                                  | 0.0                                                  |
| 94           | 0.020                                            | 0.11                                               | 0.17                                               | 0.16                                               | 0.0                                                  | 0.0020                                               |
| 96           | 0.030                                            | 0.11                                               | 0.17                                               | 0.16                                               | 0.0                                                  | 0.0030                                               |
| 98           | 0.040                                            | 0.11                                               | 0.17                                               | 0.16                                               | 0.0                                                  | 0.0040                                               |
| 100          | 0.050                                            | 0.11                                               | 0.17                                               | 0.16                                               | 0.0                                                  | 0.0060                                               |
| 103          | 0.070                                            | 0.12                                               | 0.17                                               | 0.17                                               | 0.0025                                               | 0.0080                                               |
| 110          | 0.090                                            | 0.13                                               | 0.16                                               | 0.17                                               | 0.0075                                               | 0.020                                                |
| 115          | 0.10                                             | 0.16                                               | 0.15                                               | 0.18                                               | 0.014                                                | 0.030                                                |
| 120          | 0.11                                             | 0.18                                               | 0.10                                               | 0.18                                               | 0.019                                                | 0.040                                                |

**Approach 1.**  $V_w$  is constant equal to  $V_{(3CT \rightarrow 1CT)w}$ ;  $V_w = 0.02 \text{ cm}^{-1}$  (selected examples)

Medium: DCE.  $\Delta E_{3CT \rightarrow 1CT}(\theta)$  as calculated.  $V = V_{3CT-1CT}$

| $\theta^\circ$<br>deviation | $p_{T1}$              | $\Delta E_{3CT \rightarrow 1CT}$<br>[eV] | $\Delta E_{3CT \rightarrow 1CT} * p_{T1}$ | $\lambda_{in}$<br>[eV] | $\lambda_{sum}$<br>[eV] | $k_{HSC}$ [s <sup>-1</sup> ] | $k_{HSC} * p_{T1}$          | $V$<br>[cm <sup>-1</sup> ] | $V * p_{T1}$          |
|-----------------------------|-----------------------|------------------------------------------|-------------------------------------------|------------------------|-------------------------|------------------------------|-----------------------------|----------------------------|-----------------------|
| ±30                         | 1.95×10 <sup>-9</sup> | 0.096                                    | 1.9×10 <sup>-10</sup>                     | 0.004                  | 0.096                   | 2.27×10 <sup>-5</sup>        | 4.41×10 <sup>-4</sup>       | 0.11                       | 2.1×10 <sup>-10</sup> |
| ±25                         | 2.41×10 <sup>-6</sup> | 0.074                                    | 1.8×10 <sup>-7</sup>                      | 0.003                  | 0.074                   | 4.95×10 <sup>-5</sup>        | 1.19                        | 0.10                       | 2.4×10 <sup>-7</sup>  |
| ±20                         | 2.87×10 <sup>-4</sup> | 0.053                                    | 1.5×10 <sup>-5</sup>                      | 0.002                  | 0.053                   | 1.09×10 <sup>-6</sup>        | 3.13×10 <sup>-2</sup>       | 0.09                       | 2.6×10 <sup>-5</sup>  |
| ±15                         | 7.40×10 <sup>-3</sup> | 0.033                                    | 2.5×10 <sup>-4</sup>                      | 0.001                  | 0.033                   | 1.76×10 <sup>-6</sup>        | 1.30×10 <sup>-4</sup>       | 0.07                       | 5.2×10 <sup>-4</sup>  |
| ±10                         | 6.1×10 <sup>-2</sup>  | 0.018                                    | 1.1×10 <sup>-3</sup>                      | 0.001                  | 0.018                   | 2.26×10 <sup>-6</sup>        | 1.38×10 <sup>-5</sup>       | 0.05                       | 3.1×10 <sup>-3</sup>  |
| ±8                          | 0.11                  | 0.013                                    | 1.4×10 <sup>-3</sup>                      | 0.000                  | 0.013                   | 2.04×10 <sup>-6</sup>        | 2.23×10 <sup>-5</sup>       | 0.04                       | 4.4×10 <sup>-3</sup>  |
| ±6                          | 0.17                  | 0.009                                    | 1.6×10 <sup>-3</sup>                      | 0.000                  | 0.009                   | 1.58×10 <sup>-6</sup>        | 2.68×10 <sup>-5</sup>       | 0.03                       | 5.1×10 <sup>-3</sup>  |
| ±4                          | 0.23                  | 0.006                                    | 1.5×10 <sup>-3</sup>                      | 0.000                  | 0.006                   | 9.30×10 <sup>-5</sup>        | 2.16×10 <sup>-5</sup>       | 0.02                       | 4.6×10 <sup>-3</sup>  |
| ±2                          | 0.27                  | 0.005                                    | 1.3×10 <sup>-3</sup>                      | 0.000                  | 0.005                   | 2.87×10 <sup>-5</sup>        | 7.87×10 <sup>-4</sup>       | 0.01                       | 2.7×10 <sup>-3</sup>  |
| 0                           | 0.15                  | 0.004                                    | 6.5×10 <sup>-4</sup>                      | 0.000                  | 0.004                   | 0                            | 0                           | 0                          | 0                     |
| <b>SUM</b>                  | <b>1.000</b>          |                                          | <b>0.0078</b>                             |                        |                         |                              | <b>9.37×10<sup>-5</sup></b> |                            | <b>0.020</b>          |

Medium: Tol/Hex. Each  $\Delta E_{3CT \rightarrow 1CT}(\theta)$  is divided by constant  $b = 0.502$  to attain  $\Delta E_{(3CT \rightarrow 1CT)w} = 15.6 \text{ meV}$ .  $V = V_{3CT-1CT}$

| $\theta^\circ$<br>deviation | $p_{T1}$              | $\Delta E_{3CT \rightarrow 1CT}$<br>[eV] | $\Delta E_{3CT \rightarrow 1CT} * p_{T1}$ | $\lambda_{in}$<br>[eV] | $\lambda_{sum}$<br>[eV] | $k_{HSC}$ [s <sup>-1</sup> ] | $k_{HSC} * p_{T1}$          | $V$<br>[cm <sup>-1</sup> ] | $V * p_{T1}$          |
|-----------------------------|-----------------------|------------------------------------------|-------------------------------------------|------------------------|-------------------------|------------------------------|-----------------------------|----------------------------|-----------------------|
| ±30                         | 1.95×10 <sup>-9</sup> | 0.191                                    | 3.7×10 <sup>-10</sup>                     | 0.004                  | 0.191                   | 3.98×10 <sup>-3</sup>        | 7.74×10 <sup>-6</sup>       | 0.11                       | 2.1×10 <sup>-10</sup> |
| ±25                         | 2.41×10 <sup>-6</sup> | 0.148                                    | 3.6×10 <sup>-7</sup>                      | 0.003                  | 0.148                   | 2.00×10 <sup>-4</sup>        | 4.83×10 <sup>-2</sup>       | 0.10                       | 2.4×10 <sup>-7</sup>  |
| ±20                         | 2.87×10 <sup>-4</sup> | 0.105                                    | 3.0×10 <sup>-5</sup>                      | 0.002                  | 0.105                   | 1.01×10 <sup>-5</sup>        | 0.3                         | 0.09                       | 2.6×10 <sup>-5</sup>  |
| ±15                         | 7.40×10 <sup>-3</sup> | 0.067                                    | 4.9×10 <sup>-4</sup>                      | 0.001                  | 0.067                   | 3.44×10 <sup>-5</sup>        | 2.54×10 <sup>-3</sup>       | 0.07                       | 5.2×10 <sup>-4</sup>  |
| ±10                         | 6.1×10 <sup>-2</sup>  | 0.035                                    | 2.2×10 <sup>-3</sup>                      | 0.001                  | 0.035                   | 8.05×10 <sup>-5</sup>        | 4.93×10 <sup>-4</sup>       | 0.05                       | 3.1×10 <sup>-3</sup>  |
| ±8                          | 0.11                  | 0.026                                    | 2.8×10 <sup>-3</sup>                      | 0.000                  | 0.026                   | 8.72×10 <sup>-5</sup>        | 9.54×10 <sup>-4</sup>       | 0.04                       | 4.4×10 <sup>-3</sup>  |
| ±6                          | 0.17                  | 0.018                                    | 3.1×10 <sup>-3</sup>                      | 0.000                  | 0.018                   | 7.82×10 <sup>-5</sup>        | 1.33×10 <sup>-5</sup>       | 0.03                       | 5.1×10 <sup>-3</sup>  |
| ±4                          | 0.23                  | 0.013                                    | 3.0×10 <sup>-3</sup>                      | 0.000                  | 0.013                   | 5.13×10 <sup>-5</sup>        | 1.19×10 <sup>-5</sup>       | 0.02                       | 4.6×10 <sup>-3</sup>  |
| ±2                          | 0.27                  | 0.010                                    | 2.6×10 <sup>-3</sup>                      | 0.000                  | 0.010                   | 1.69×10 <sup>-5</sup>        | 4.63×10 <sup>-4</sup>       | 0.01                       | 2.7×10 <sup>-3</sup>  |
| 0                           | 0.15                  | 0.009                                    | 1.3×10 <sup>-3</sup>                      | 0.000                  | 0.009                   | 0                            | 0                           | 0.00                       | 0                     |
| <b>SUM</b>                  | <b>1.000</b>          |                                          | <b>0.0156</b>                             |                        |                         |                              | <b>4.46×10<sup>-5</sup></b> |                            | <b>0.0205</b>         |

Medium: DMSO. Each  $\Delta E_{3CT \rightarrow 1CT}(\theta)$  is divided by constant  $b = 1.58$  to attain  $\Delta E_{(3CT \rightarrow 1CT)w} = 5.0 \text{ meV}$ .  $V = V_{3CT-1CT}$

| $\theta^\circ$<br>deviation | $p_{T1}$              | $\Delta E_{3CT \rightarrow 1CT}$<br>[eV] | $\Delta E_{3CT \rightarrow 1CT} * p_{T1}$ | $\lambda_{in}$<br>[eV] | $\lambda_{sum}$<br>[eV] | $k_{HSC}$ [s <sup>-1</sup> ] | $k_{HSC} * p_{T1}$          | $V$<br>[cm <sup>-1</sup> ] | $V * p_{T1}$          |
|-----------------------------|-----------------------|------------------------------------------|-------------------------------------------|------------------------|-------------------------|------------------------------|-----------------------------|----------------------------|-----------------------|
| ±30                         | 1.95×10 <sup>-9</sup> | 0.061                                    | 1.2×10 <sup>-10</sup>                     | 0.004                  | 0.061                   | 1.12×10 <sup>-6</sup>        | 2.18×10 <sup>-3</sup>       | 0.11                       | 2.1×10 <sup>-10</sup> |
| ±25                         | 2.41×10 <sup>-6</sup> | 0.047                                    | 1.1×10 <sup>-7</sup>                      | 0.003                  | 0.047                   | 1.79×10 <sup>-6</sup>        | 4.33                        | 0.10                       | 2.4×10 <sup>-7</sup>  |
| ±20                         | 2.87×10 <sup>-4</sup> | 0.033                                    | 9.6×10 <sup>-6</sup>                      | 0.002                  | 0.033                   | 2.92×10 <sup>-6</sup>        | 8.36×10 <sup>-2</sup>       | 0.09                       | 2.6×10 <sup>-5</sup>  |
| ±15                         | 7.40×10 <sup>-3</sup> | 0.021                                    | 1.6×10 <sup>-4</sup>                      | 0.001                  | 0.021                   | 3.57×10 <sup>-6</sup>        | 2.64×10 <sup>-4</sup>       | 0.07                       | 5.2×10 <sup>-4</sup>  |
| ±10                         | 6.1×10 <sup>-2</sup>  | 0.011                                    | 6.9×10 <sup>-4</sup>                      | 0.001                  | 0.011                   | 3.66×10 <sup>-6</sup>        | 2.24×10 <sup>-5</sup>       | 0.05                       | 3.1×10 <sup>-3</sup>  |
| ±8                          | 0.11                  | 0.008                                    | 9.0×10 <sup>-4</sup>                      | 0.000                  | 0.008                   | 3.08×10 <sup>-6</sup>        | 3.37×10 <sup>-5</sup>       | 0.04                       | 4.4×10 <sup>-3</sup>  |
| ±6                          | 0.17                  | 0.006                                    | 1.0×10 <sup>-3</sup>                      | 0.000                  | 0.006                   | 2.26×10 <sup>-6</sup>        | 3.85×10 <sup>-5</sup>       | 0.03                       | 5.1×10 <sup>-3</sup>  |
| ±4                          | 0.23                  | 0.004                                    | 9.5×10 <sup>-4</sup>                      | 0.000                  | 0.004                   | 1.28×10 <sup>-6</sup>        | 2.97×10 <sup>-5</sup>       | 0.02                       | 4.6×10 <sup>-3</sup>  |
| ±2                          | 0.27                  | 0.003                                    | 8.4×10 <sup>-4</sup>                      | 0.000                  | 0.003                   | 3.87×10 <sup>-5</sup>        | 1.06×10 <sup>-5</sup>       | 0.01                       | 2.7×10 <sup>-3</sup>  |
| 0                           | 0.15                  | 0.003                                    | 4.1×10 <sup>-4</sup>                      | 0.000                  | 0.003                   | 0                            | 0                           | 0.00                       | 0                     |
| <b>SUM</b>                  | <b>1.000</b>          |                                          | <b>0.0050</b>                             |                        |                         |                              | <b>1.38×10<sup>-6</sup></b> |                            | <b>0.0205</b>         |

**Approach 2.  $V_w$  is constant and higher than  $V_{3CT \rightarrow 1CT}$ ;  $V_w = 0.044 \text{ cm}^{-1}$  (selected examples)**

Medium: DCE.  $\Delta E_{3CT \rightarrow 1CT}(\theta)$  as calculated. To each  $V_{3CT-1CT}(\theta)$  a constant value  $c = 0.021$  is added to attain  $V_w = 0.044 \text{ cm}^{-1}$

| $\theta^\circ$<br>deviation | $p_{T1}$              | $\Delta E_{3CT \rightarrow 1CT}$<br>[eV] | $\Delta E_{3CT \rightarrow 1CT} * p_{T1}$ | $\lambda_{in}$<br>[eV] | $\lambda_{sum}$<br>[eV] | $k_{HSC}$ [s <sup>-1</sup> ] | $k_{HSC} * p_{T1}$          | $V$<br>[cm <sup>-1</sup> ] | $V * p_{T1}$          |
|-----------------------------|-----------------------|------------------------------------------|-------------------------------------------|------------------------|-------------------------|------------------------------|-----------------------------|----------------------------|-----------------------|
| ±30                         | 1.95×10 <sup>-9</sup> | 0.096                                    | 1.9×10 <sup>-10</sup>                     | 0.004                  | 0.096                   | 3.22×10 <sup>-5</sup>        | 6.26×10 <sup>-4</sup>       | 0.13                       | 2.5×10 <sup>-10</sup> |
| ±25                         | 2.41×10 <sup>-6</sup> | 0.074                                    | 1.8×10 <sup>-7</sup>                      | 0.003                  | 0.074                   | 7.24×10 <sup>-5</sup>        | 1.75                        | 0.12                       | 2.9×10 <sup>-7</sup>  |
| ±20                         | 2.87×10 <sup>-4</sup> | 0.053                                    | 1.5×10 <sup>-5</sup>                      | 0.002                  | 0.053                   | 1.66×10 <sup>-6</sup>        | 4.76×10 <sup>-2</sup>       | 0.11                       | 3.2×10 <sup>-5</sup>  |
| ±15                         | 7.40×10 <sup>-3</sup> | 0.033                                    | 2.5×10 <sup>-4</sup>                      | 0.001                  | 0.033                   | 2.98×10 <sup>-6</sup>        | 2.20×10 <sup>-4</sup>       | 0.09                       | 6.7×10 <sup>-4</sup>  |
| ±10                         | 6.1×10 <sup>-2</sup>  | 0.018                                    | 1.1×10 <sup>-3</sup>                      | 0.001                  | 0.018                   | 4.56×10 <sup>-6</sup>        | 2.79×10 <sup>-5</sup>       | 0.07                       | 4.3×10 <sup>-3</sup>  |
| ±8                          | 0.11                  | 0.013                                    | 1.4×10 <sup>-3</sup>                      | 0.000                  | 0.013                   | 4.74×10 <sup>-6</sup>        | 5.18×10 <sup>-5</sup>       | 0.06                       | 6.7×10 <sup>-3</sup>  |
| ±6                          | 0.17                  | 0.009                                    | 1.6×10 <sup>-3</sup>                      | 0.000                  | 0.009                   | 4.56×10 <sup>-6</sup>        | 7.76×10 <sup>-5</sup>       | 0.05                       | 8.7×10 <sup>-3</sup>  |
| ±4                          | 0.23                  | 0.006                                    | 1.5×10 <sup>-3</sup>                      | 0.000                  | 0.006                   | 3.91×10 <sup>-6</sup>        | 9.06×10 <sup>-5</sup>       | 0.04                       | 9.5×10 <sup>-3</sup>  |
| ±2                          | 0.27                  | 0.005                                    | 1.3×10 <sup>-3</sup>                      | 0.000                  | 0.005                   | 2.76×10 <sup>-6</sup>        | 7.56×10 <sup>-5</sup>       | 0.03                       | 8.5×10 <sup>-3</sup>  |
| 0                           | 0.15                  | 0.004                                    | 6.5×10 <sup>-4</sup>                      | 0.000                  | 0.004                   | 1.34×10 <sup>-6</sup>        | 1.94×10 <sup>-5</sup>       | 0.02                       | 5.8×10 <sup>-3</sup>  |
| <b>SUM</b>                  | <b>1.000</b>          |                                          | <b>0.0078</b>                             |                        |                         |                              | <b>3.45×10<sup>-6</sup></b> |                            | <b>0.044</b>          |

Medium: Tol/Hex. Each  $\Delta E_{3CT \rightarrow 1CT}(\theta)$  divided by constant  $b = 0.502$  to attain  $\Delta E_{(3CT \rightarrow 1CT)_w} = 15.6 \text{ meV}$ . To each  $V_{3CT-1CT}(\theta)$  a constant value  $c = 0.021$  is added to attain  $V_w = 0.044 \text{ cm}^{-1}$

| $\theta^\circ$<br>deviation | $p_{T1}$              | $\Delta E_{3CT \rightarrow 1CT}$<br>[eV] | $\Delta E_{3CT \rightarrow 1CT} * p_{T1}$ | $\lambda_{in}$<br>[eV] | $\lambda_{sum}$<br>[eV] | $k_{HSC}$ [s <sup>-1</sup> ] | $k_{HSC} * p_{T1}$          | $V$<br>[cm <sup>-1</sup> ] | $V * p_{T1}$          |
|-----------------------------|-----------------------|------------------------------------------|-------------------------------------------|------------------------|-------------------------|------------------------------|-----------------------------|----------------------------|-----------------------|
| ±30                         | 1.95×10 <sup>-9</sup> | 0.191                                    | 3.7×10 <sup>-10</sup>                     | 0.004                  | 0.191                   | 5.64×10 <sup>-3</sup>        | 1.10×10 <sup>-5</sup>       | 0.13                       | 2.5×10 <sup>-10</sup> |
| ±25                         | 2.41×10 <sup>-6</sup> | 0.148                                    | 3.6×10 <sup>-7</sup>                      | 0.003                  | 0.148                   | 2.93×10 <sup>-4</sup>        | 7.07×10 <sup>-2</sup>       | 0.12                       | 2.9×10 <sup>-7</sup>  |
| ±20                         | 2.87×10 <sup>-4</sup> | 0.105                                    | 3.0×10 <sup>-5</sup>                      | 0.002                  | 0.105                   | 1.54×10 <sup>-5</sup>        | 4.41×10 <sup>-1</sup>       | 0.11                       | 3.2×10 <sup>-5</sup>  |
| ±15                         | 7.40×10 <sup>-3</sup> | 0.067                                    | 4.9×10 <sup>-4</sup>                      | 0.001                  | 0.067                   | 5.81×10 <sup>-5</sup>        | 4.30×10 <sup>-3</sup>       | 0.09                       | 6.7×10 <sup>-4</sup>  |
| ±10                         | 6.1×10 <sup>-2</sup>  | 0.035                                    | 2.2×10 <sup>-3</sup>                      | 0.001                  | 0.035                   | 1.62×10 <sup>-6</sup>        | 9.94×10 <sup>-4</sup>       | 0.07                       | 4.3×10 <sup>-3</sup>  |
| ±8                          | 0.11                  | 0.026                                    | 2.8×10 <sup>-3</sup>                      | 0.000                  | 0.026                   | 2.03×10 <sup>-6</sup>        | 2.22×10 <sup>-5</sup>       | 0.06                       | 6.7×10 <sup>-3</sup>  |
| ±6                          | 0.17                  | 0.018                                    | 3.1×10 <sup>-3</sup>                      | 0.000                  | 0.018                   | 2.26×10 <sup>-6</sup>        | 3.85×10 <sup>-5</sup>       | 0.05                       | 8.7×10 <sup>-3</sup>  |
| ±4                          | 0.23                  | 0.013                                    | 3.0×10 <sup>-3</sup>                      | 0.000                  | 0.013                   | 2.15×10 <sup>-6</sup>        | 5.00×10 <sup>-5</sup>       | 0.04                       | 9.5×10 <sup>-3</sup>  |
| ±2                          | 0.27                  | 0.010                                    | 2.6×10 <sup>-3</sup>                      | 0.000                  | 0.010                   | 1.62×10 <sup>-6</sup>        | 4.45×10 <sup>-5</sup>       | 0.03                       | 8.5×10 <sup>-3</sup>  |
| 0                           | 0.15                  | 0.009                                    | 1.3×10 <sup>-3</sup>                      | 0.000                  | 0.009                   | 7.97×10 <sup>-5</sup>        | 1.16×10 <sup>-5</sup>       | 0.02                       | 5.8×10 <sup>-3</sup>  |
| <b>SUM</b>                  | <b>1.000</b>          |                                          | <b>0.0156</b>                             |                        |                         |                              | <b>1.77×10<sup>-6</sup></b> |                            | <b>0.044</b>          |

Medium: DMSO. Each  $\Delta E_{3CT \rightarrow 1CT}(\theta)$  is divided by constant  $b = 1.58$  to attain  $\Delta E_{(3CT \rightarrow 1CT)_w} = 5.0 \text{ meV}$ . To each  $V_{3CT-1CT}(\theta)$  a constant value  $c = 0.021$  is added to attain  $V_w = 0.044 \text{ cm}^{-1}$

| $\theta^\circ$<br>deviation | $p_{T1}$              | $\Delta E_{3CT \rightarrow 1CT}$<br>[eV] | $\Delta E_{3CT \rightarrow 1CT} * p_{T1}$ | $\lambda_{in}$<br>[eV] | $\lambda_{sum}$<br>[eV] | $k_{HSC}$ [s <sup>-1</sup> ] | $k_{HSC} * p_{T1}$          | $V$<br>[cm <sup>-1</sup> ] | $V * p_{T1}$          |
|-----------------------------|-----------------------|------------------------------------------|-------------------------------------------|------------------------|-------------------------|------------------------------|-----------------------------|----------------------------|-----------------------|
| ±30                         | 1.95×10 <sup>-9</sup> | 0.061                                    | 1.2×10 <sup>-10</sup>                     | 0.004                  | 0.061                   | 1.59×10 <sup>-6</sup>        | 3.09×10 <sup>-3</sup>       | 0.13                       | 2.5×10 <sup>-10</sup> |
| ±25                         | 2.41×10 <sup>-6</sup> | 0.047                                    | 1.1×10 <sup>-7</sup>                      | 0.003                  | 0.047                   | 2.63×10 <sup>-6</sup>        | 6.33                        | 0.12                       | 2.9×10 <sup>-7</sup>  |
| ±20                         | 2.87×10 <sup>-4</sup> | 0.033                                    | 9.6×10 <sup>-6</sup>                      | 0.002                  | 0.033                   | 4.44×10 <sup>-6</sup>        | 1.27×10 <sup>-3</sup>       | 0.11                       | 3.2×10 <sup>-5</sup>  |
| ±15                         | 7.40×10 <sup>-3</sup> | 0.021                                    | 1.6×10 <sup>-4</sup>                      | 0.001                  | 0.021                   | 6.03×10 <sup>-6</sup>        | 4.46×10 <sup>-4</sup>       | 0.09                       | 6.7×10 <sup>-4</sup>  |
| ±10                         | 6.1×10 <sup>-2</sup>  | 0.011                                    | 6.9×10 <sup>-4</sup>                      | 0.001                  | 0.011                   | 7.39×10 <sup>-6</sup>        | 4.52×10 <sup>-5</sup>       | 0.07                       | 4.3×10 <sup>-3</sup>  |
| ±8                          | 0.11                  | 0.008                                    | 9.0×10 <sup>-4</sup>                      | 0.000                  | 0.008                   | 7.17×10 <sup>-6</sup>        | 7.84×10 <sup>-5</sup>       | 0.06                       | 6.7×10 <sup>-3</sup>  |
| ±6                          | 0.17                  | 0.006                                    | 1.0×10 <sup>-3</sup>                      | 0.000                  | 0.006                   | 6.54×10 <sup>-6</sup>        | 1.11×10 <sup>-6</sup>       | 0.05                       | 8.7×10 <sup>-3</sup>  |
| ±4                          | 0.23                  | 0.004                                    | 9.5×10 <sup>-4</sup>                      | 0.000                  | 0.004                   | 5.39×10 <sup>-6</sup>        | 1.25×10 <sup>-6</sup>       | 0.04                       | 9.5×10 <sup>-3</sup>  |
| ±2                          | 0.27                  | 0.003                                    | 8.4×10 <sup>-4</sup>                      | 0.000                  | 0.003                   | 3.72×10 <sup>-6</sup>        | 1.02×10 <sup>-6</sup>       | 0.03                       | 8.5×10 <sup>-3</sup>  |
| 0                           | 0.15                  | 0.003                                    | 4.1×10 <sup>-4</sup>                      | 0.000                  | 0.003                   | 1.79×10 <sup>-6</sup>        | 2.60×10 <sup>-5</sup>       | 0.02                       | 5.8×10 <sup>-3</sup>  |
| <b>SUM</b>                  | <b>1.000</b>          |                                          | <b>0.0050</b>                             |                        |                         |                              | <b>4.92×10<sup>-6</sup></b> |                            | <b>0.044</b>          |

**Approach 3.  $V_w$  is dependent on the medium. variable.** (selected examples)

Medium: DCE.  $\Delta E_{3CT \rightarrow 1CT}(\theta)$  as calculated. To each  $V_{3CT-1CT}(\theta)$  a constant value  $c = 0.0213$  is added to attain  $V_w = 0.045 \text{ cm}^{-1}$

| $\theta^\circ$<br>deviation | $p_{T1}$              | $\Delta E_{3CT \rightarrow 1CT}$<br>[eV] | $\Delta E_{3CT \rightarrow 1CT} * p_{T1}$ | $\lambda_{in}$<br>[eV] | $\lambda_{sum}$<br>[eV] | $k_{rISC}$ [s <sup>-1</sup> ] | $k_{rISC} * p_{T1}$         | $V$<br>[cm <sup>-1</sup> ] | $V * p_{T1}$          |
|-----------------------------|-----------------------|------------------------------------------|-------------------------------------------|------------------------|-------------------------|-------------------------------|-----------------------------|----------------------------|-----------------------|
| ±30                         | 1.95×10 <sup>-9</sup> | 0.096                                    | 1.9×10 <sup>-10</sup>                     | 0.004                  | 0.096                   | 3.23×10 <sup>-5</sup>         | 6.29×10 <sup>-4</sup>       | 0.13                       | 2.6×10 <sup>-10</sup> |
| ±25                         | 2.41×10 <sup>-6</sup> | 0.074                                    | 1.8×10 <sup>-7</sup>                      | 0.003                  | 0.074                   | 7.28×10 <sup>-5</sup>         | 1.76                        | 0.12                       | 2.9×10 <sup>-7</sup>  |
| ±20                         | 2.87×10 <sup>-4</sup> | 0.053                                    | 1.5×10 <sup>-5</sup>                      | 0.002                  | 0.053                   | 1.67×10 <sup>-6</sup>         | 4.79×10 <sup>-2</sup>       | 0.11                       | 3.2×10 <sup>-5</sup>  |
| ±15                         | 7.40×10 <sup>-3</sup> | 0.033                                    | 2.5×10 <sup>-4</sup>                      | 0.001                  | 0.033                   | 3.00×10 <sup>-6</sup>         | 2.22×10 <sup>-4</sup>       | 0.09                       | 6.8×10 <sup>-4</sup>  |
| ±10                         | 6.1×10 <sup>-2</sup>  | 0.018                                    | 1.1×10 <sup>-3</sup>                      | 0.001                  | 0.018                   | 4.60×10 <sup>-6</sup>         | 2.81×10 <sup>-5</sup>       | 0.07                       | 4.4×10 <sup>-3</sup>  |
| ±8                          | 0.11                  | 0.013                                    | 1.4×10 <sup>-3</sup>                      | 0.000                  | 0.013                   | 4.78×10 <sup>-6</sup>         | 5.23×10 <sup>-5</sup>       | 0.06                       | 6.7×10 <sup>-3</sup>  |
| ±6                          | 0.17                  | 0.009                                    | 1.6×10 <sup>-3</sup>                      | 0.000                  | 0.009                   | 4.61×10 <sup>-6</sup>         | 7.85×10 <sup>-5</sup>       | 0.05                       | 8.7×10 <sup>-3</sup>  |
| ±4                          | 0.23                  | 0.006                                    | 1.5×10 <sup>-3</sup>                      | 0.000                  | 0.006                   | 3.96×10 <sup>-6</sup>         | 9.19×10 <sup>-5</sup>       | 0.04                       | 9.6×10 <sup>-3</sup>  |
| ±2                          | 0.27                  | 0.005                                    | 1.3×10 <sup>-3</sup>                      | 0.000                  | 0.005                   | 2.81×10 <sup>-6</sup>         | 7.71×10 <sup>-5</sup>       | 0.03                       | 8.6×10 <sup>-3</sup>  |
| 0                           | 0.15                  | 0.004                                    | 6.5×10 <sup>-4</sup>                      | 0.000                  | 0.004                   | 1.37×10 <sup>-6</sup>         | 2.00×10 <sup>-5</sup>       | 0.02                       | 5.8×10 <sup>-3</sup>  |
| <b>SUM</b>                  | <b>1.000</b>          |                                          | <b>0.0078</b>                             |                        |                         |                               | <b>3.50×10<sup>-6</sup></b> |                            | <b>0.045</b>          |

Medium: Tol/Hex. Each  $\Delta E_{3CT \rightarrow 1CT}(\theta)$  divided by constant  $b = 0.502$  to attain  $\Delta E_{(3CT \rightarrow 1CT)w} = 15.6 \text{ meV}$ . To each  $V_{3CT-1CT}(\theta)$  a constant value  $c = 0.027$  is added to attain  $V_w = 0.051 \text{ cm}^{-1}$

| $\theta^\circ$<br>deviation | $p_{T1}$              | $\Delta E_{3CT \rightarrow 1CT}$<br>[eV] | $\Delta E_{3CT \rightarrow 1CT} * p_{T1}$ | $\lambda_{in}$<br>[eV] | $\lambda_{sum}$<br>[eV] | $k_{rISC}$ [s <sup>-1</sup> ] | $k_{rISC} * p_{T1}$         | $V$<br>[cm <sup>-1</sup> ] | $V * p_{T1}$          |
|-----------------------------|-----------------------|------------------------------------------|-------------------------------------------|------------------------|-------------------------|-------------------------------|-----------------------------|----------------------------|-----------------------|
| ±30                         | 1.95×10 <sup>-9</sup> | 0.191                                    | 3.7×10 <sup>-10</sup>                     | 0.004                  | 0.191                   | 6.17×10 <sup>-3</sup>         | 1.20×10 <sup>-5</sup>       | 0.14                       | 2.7×10 <sup>-10</sup> |
| ±25                         | 2.41×10 <sup>-6</sup> | 0.148                                    | 3.6×10 <sup>-7</sup>                      | 0.003                  | 0.148                   | 3.23×10 <sup>-4</sup>         | 7.79×10 <sup>-2</sup>       | 0.13                       | 3.1×10 <sup>-7</sup>  |
| ±20                         | 2.87×10 <sup>-4</sup> | 0.105                                    | 3.0×10 <sup>-5</sup>                      | 0.002                  | 0.105                   | 1.71×10 <sup>-5</sup>         | 4.90×10 <sup>-1</sup>       | 0.12                       | 3.4×10 <sup>-5</sup>  |
| ±15                         | 7.40×10 <sup>-3</sup> | 0.067                                    | 4.9×10 <sup>-4</sup>                      | 0.001                  | 0.067                   | 6.60×10 <sup>-5</sup>         | 4.88×10 <sup>-3</sup>       | 0.10                       | 7.2×10 <sup>-4</sup>  |
| ±10                         | 6.1×10 <sup>-2</sup>  | 0.035                                    | 2.2×10 <sup>-3</sup>                      | 0.001                  | 0.035                   | 1.91×10 <sup>-6</sup>         | 1.17×10 <sup>-5</sup>       | 0.08                       | 4.7×10 <sup>-3</sup>  |
| ±8                          | 0.11                  | 0.026                                    | 2.8×10 <sup>-3</sup>                      | 0.000                  | 0.026                   | 2.45×10 <sup>-6</sup>         | 2.68×10 <sup>-5</sup>       | 0.07                       | 7.3×10 <sup>-3</sup>  |
| ±6                          | 0.17                  | 0.018                                    | 3.1×10 <sup>-3</sup>                      | 0.000                  | 0.018                   | 2.82×10 <sup>-6</sup>         | 4.81×10 <sup>-5</sup>       | 0.06                       | 9.7×10 <sup>-3</sup>  |
| ±4                          | 0.23                  | 0.013                                    | 3.0×10 <sup>-3</sup>                      | 0.000                  | 0.013                   | 2.83×10 <sup>-6</sup>         | 6.57×10 <sup>-5</sup>       | 0.05                       | 1.1×10 <sup>-2</sup>  |
| ±2                          | 0.27                  | 0.010                                    | 2.6×10 <sup>-3</sup>                      | 0.000                  | 0.010                   | 2.31×10 <sup>-6</sup>         | 6.33×10 <sup>-5</sup>       | 0.04                       | 1.0×10 <sup>-2</sup>  |
| 0                           | 0.15                  | 0.009                                    | 1.3×10 <sup>-3</sup>                      | 0.000                  | 0.009                   | 1.32×10 <sup>-6</sup>         | 1.92×10 <sup>-5</sup>       | 0.03                       | 7.4×10 <sup>-3</sup>  |
| <b>SUM</b>                  | <b>1.000</b>          |                                          | <b>0.0156</b>                             |                        |                         |                               | <b>2.35×10<sup>-6</sup></b> |                            | <b>0.051</b>          |

Medium: DMSO. Each  $\Delta E_{3CT \rightarrow 1CT}(\theta)$  is divided by constant  $b = 1.58$  to attain  $\Delta E_{(3CT \rightarrow 1CT)w} = 5.0 \text{ meV}$ . To each  $V_{3CT-1CT}(\theta)$  a constant value  $c = 0.0154$  is added to attain  $V_w = 0.038 \text{ cm}^{-1}$

| $\theta^\circ$<br>deviation | $p_{T1}$              | $\Delta E_{3CT \rightarrow 1CT}$<br>[eV] | $\Delta E_{3CT \rightarrow 1CT} * p_{T1}$ | $\lambda_{in}$ [eV] | $\lambda_{sum}$<br>[eV] | $k_{rISC}$ [s <sup>-1</sup> ] | $k_{rISC} * p_{T1}$         | $V$<br>[cm <sup>-1</sup> ] | $V * p_{T1}$          |
|-----------------------------|-----------------------|------------------------------------------|-------------------------------------------|---------------------|-------------------------|-------------------------------|-----------------------------|----------------------------|-----------------------|
| ±30                         | 1.95×10 <sup>-9</sup> | 0.061                                    | 1.2×10 <sup>-10</sup>                     | 0.004               | 0.061                   | 1.46×10 <sup>-6</sup>         | 2.83×10 <sup>-3</sup>       | 0.13                       | 2.4×10 <sup>-10</sup> |
| ±25                         | 2.41×10 <sup>-6</sup> | 0.047                                    | 1.1×10 <sup>-7</sup>                      | 0.003               | 0.047                   | 2.39×10 <sup>-6</sup>         | 5.76                        | 0.12                       | 2.8×10 <sup>-7</sup>  |
| ±20                         | 2.87×10 <sup>-4</sup> | 0.033                                    | 9.6×10 <sup>-6</sup>                      | 0.002               | 0.033                   | 4.00×10 <sup>-6</sup>         | 1.15×10 <sup>-3</sup>       | 0.11                       | 3.0×10 <sup>-5</sup>  |
| ±15                         | 7.40×10 <sup>-3</sup> | 0.021                                    | 1.6×10 <sup>-4</sup>                      | 0.001               | 0.021                   | 5.31×10 <sup>-6</sup>         | 3.93×10 <sup>-4</sup>       | 0.09                       | 6.3×10 <sup>-4</sup>  |
| ±10                         | 6.1×10 <sup>-2</sup>  | 0.011                                    | 6.9×10 <sup>-4</sup>                      | 0.001               | 0.011                   | 6.27×10 <sup>-6</sup>         | 3.84×10 <sup>-5</sup>       | 0.07                       | 4.0×10 <sup>-3</sup>  |
| ±8                          | 0.11                  | 0.008                                    | 9.0×10 <sup>-4</sup>                      | 0.000               | 0.008                   | 5.91×10 <sup>-6</sup>         | 6.47×10 <sup>-5</sup>       | 0.06                       | 6.1×10 <sup>-3</sup>  |
| ±6                          | 0.17                  | 0.006                                    | 1.0×10 <sup>-3</sup>                      | 0.000               | 0.006                   | 5.18×10 <sup>-6</sup>         | 8.82×10 <sup>-5</sup>       | 0.05                       | 7.7×10 <sup>-3</sup>  |
| ±4                          | 0.23                  | 0.004                                    | 9.5×10 <sup>-4</sup>                      | 0.000               | 0.004                   | 4.02×10 <sup>-6</sup>         | 9.32×10 <sup>-5</sup>       | 0.04                       | 8.2×10 <sup>-3</sup>  |
| ±2                          | 0.27                  | 0.003                                    | 8.4×10 <sup>-4</sup>                      | 0.000               | 0.003                   | 2.50×10 <sup>-6</sup>         | 6.84×10 <sup>-5</sup>       | 0.03                       | 7.0×10 <sup>-3</sup>  |
| 0                           | 0.15                  | 0.003                                    | 4.1×10 <sup>-4</sup>                      | 0.000               | 0.003                   | 9.63×10 <sup>-5</sup>         | 1.40×10 <sup>-5</sup>       | 0.02                       | 4.2×10 <sup>-3</sup>  |
| <b>SUM</b>                  | <b>1.000</b>          |                                          | <b>0.0050</b>                             |                     |                         |                               | <b>3.71×10<sup>-6</sup></b> |                            | <b>0.038</b>          |

Table S9. Linear regression parameters for the fitted dependencies Figure 6 main text.

| <b>Parameter</b> | <b>Plot Exp.</b> | <b>Plot</b><br>$V = V_{3CT \rightarrow 1CT}$ | <b>Plot</b><br>$V = 0.44 \text{ cm}^{-1}$ | <b>Plot</b><br>$V \text{ variable}$ |
|------------------|------------------|----------------------------------------------|-------------------------------------------|-------------------------------------|
| Slope            | $-1.14 \pm 0.09$ | $-2.58 \pm 0.27$                             | $-2.39 \pm 0.25$                          | $-1.09 \pm 0.09$                    |
| Intercept        | $18.28 \pm 0.26$ | $21.14 \pm 0.81$                             | $21.92 \pm 0.75$                          | $18.15 \pm 0.28$                    |
| $R^2$            | 0.98             | 0.97                                         | 0.97                                      | 0.98                                |

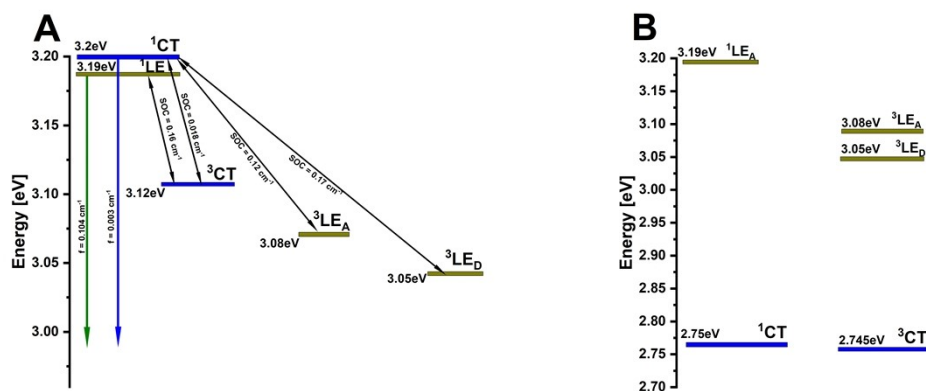

Figure S12. Energy diagram for TMCz-BO in (A) Benzene in 77K, (B) in DMSO in RT .

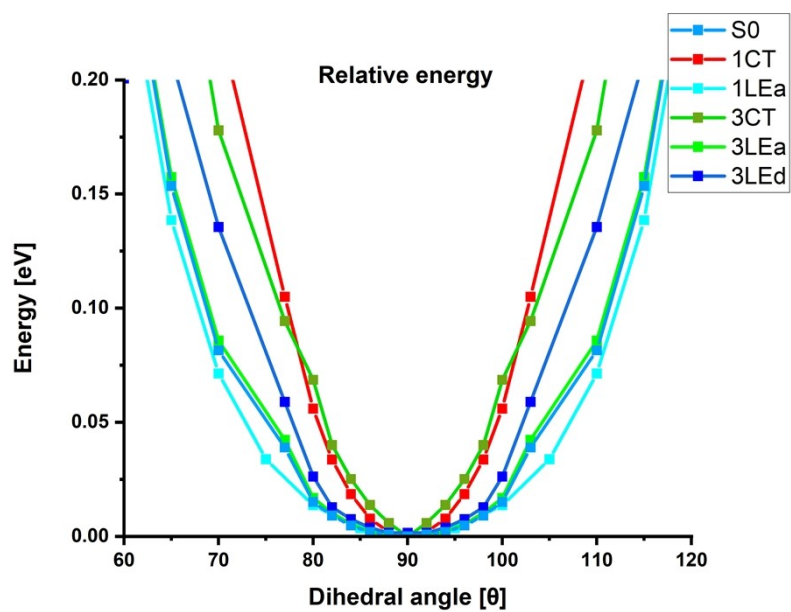

Figure S13. The dependence of relative energy of electronic state on dihedral angle  $\theta$



## REFERENCES

---

- [S1] Y. Tao, K. Yuan, T. Chen, P. Xu, H. Li, R. Chen, C. Zheng, L. Zhang, W. Huang, *Adv. Mater.*, 2014, 26, 7931–7958.
- [S2] I. E. Serdiuk, M. Monka, K. Kozakiewicz, B. Liberek, P. Bojarski, S. O. Park, *J. Phys. Chem. B.*, 2021, 125, 2696–2706.
- [S3] P. K. Samanta, D. Kim, V. Coropceanu, J. L. Brédas, *J. Am. Chem. Soc.*, 2017, 139, 4042–4051.
